# Supplementary material for: C-Reactive Protein for the Early Assessment of Non-Malarial Febrile Patients: A Retrospective Diagnostic Study
Source: MDPI journal article supplement (doi:10.3390/diagnostics11091728), 2021-09-20
Supplement: s1 [file s1]

**Supplementary Table S1.** Demographical and clinical characteristics

| DEMOGRAPHICAL DATA                                  |                                                                                                                                    |
|-----------------------------------------------------|------------------------------------------------------------------------------------------------------------------------------------|
| SEX                                                 | (FEMALE/MALE)                                                                                                                      |
| AGE > 18                                            | (YEARS)                                                                                                                            |
| PATIENTS' ORIGIN                                    |                                                                                                                                    |
| CLINICAL DATA                                       |                                                                                                                                    |
| HIV                                                 | (YES/NO)                                                                                                                           |
| FEVER ON ADMISSION                                  | (YES/NO)                                                                                                                           |
| TEMPERATURE ON ADMISSION                            | (°C)                                                                                                                               |
| FEVER IN THE LAST 24 HOURS                          | (YES/NO)                                                                                                                           |
| TEMPERATURE IN THE LAST 24 HOURS                    | (°C)                                                                                                                               |
| MAXIMUM OBSERVED TEMPERATURE DURING HOSPITALIZATION | (°C)                                                                                                                               |
| FEVER DURATION                                      | (DAYS)                                                                                                                             |
| CARDIAC FREQUENCY                                   | (bpm)                                                                                                                              |
| DIAGNOSIS<br>DIAGNOSE CONFIRMED                     | ICD9*<br>Serology,<br>parasitological/histological/microbiological<br>identification, PCR, radiological signs,<br>urinary antigens |
| DIED                                                | (YES/NO)                                                                                                                           |

\* International classification of Diseases

**Supplementary Table S2.** Clinical biomarkers associated with bacterial diseases, results of univariable logistic regressions.

| BIOMARKER   | N   | OR    | 95% CI         | P-value |
|-------------|-----|-------|----------------|---------|
| CRP         | 804 | 1.037 | 1.030 - 1.045  | <.0001  |
| WBC         | 804 | 1.295 | 1.227 - 1.367  | <.0001  |
| NEUTROPHILS | 748 | 1.370 | 1.280 - 1.466  | <.0001  |
| LEUCOCYTES  | 750 | 0.967 | 0.820 - 1.141  | 0.6930  |
| EOSINOPHILS | 697 | 4.520 | 0.727 - 28.096 | 0.1055  |
| LDH         | 657 | 1.001 | 0.999 - 1.002  | 0.3654  |
| FIBRINOGEN  | 695 | 2.809 | 2.279 - 3.463  | <.0001  |

NOTE. CRP: N is the number of non missing values. C-Reactive Protein. WBC: White Blood Cells. LDH: Lactate Dehydrogenase. OR: Odds Ratio, CI: Confidence Intervals.
